# Supplementary material for: Investigating changes in thiophene-bearing quinones of the archaeon Acidianus manzaensis after exposure to Mars-like conditions
Source: Research Square preprint supplement (doi:10.21203/rs.3.rs-7565488/v1), 2025-09-29
Supplement: Supplementary file 1 [file 4bc1af3053d71ef964159b44.xlsx]

## Sheet: SUM Groups
Tentative annotation using MetaboScape®									MS																					MS/MS
RT [min]	m/z meas.	M meas.	Ions	Name	Molecular Formula	Δm/z [ppm]	Δm/z [mDa]	mSigma	blank	Fc1	Fc2	Fc3	Fc4	Lc1	Lc2	Lc3	Lc4	Tc1	Tc2	Tc3	Tc4	ne1	ne2	ne3	ne4	e1	e2	e3	e4	Fc1	Fc2	Fc3	Fc4	Lc1	Lc2	Lc3	Lc4	Tc1	Tc2	Tc3	Tc4	ne1	ne2	ne3	ne4	e1	e2	e3	e4
16.13	491.301	490.294	[M+H]+	CQ4:0	C29H46O2S2	0.563	0.277	∞	0	97245	139202	124835	120912	77386	112645	104360	0	20515	22924	65904	43278	41196	0	0	54754	90244	110892	94286	107283	54495	79680	73642	73160	49070	54456	50064	60651	56728	57172	20836	55707	12355	43817	12377	16487	66996	58467	56811	54564
16.05	781.502	758.513	[M+Na]+	CQ8:6	C49H74O2S2	-0.472	-0.369	53.3	0	46129	0	51417	44289	0	32095	0	0	39120	0	0	38473	27386	177188	0	0	25772	12654	0	0	28506	0	0	0	0	0	0	0	0	0	0	0	0	80721	0	0	0	0	0	0
16.43	857.629	834.639	[M+Na]+	CQ9:3	C54H90O2S2	1.289	1.106	149.8	0	0	24396	21870	22711	16782	20535	17857	22300	16845	16683	16670	16552	19635	0	15096	0	22894	15483	21789	12728	0	0	0	0	0	0	0	0	0	0	0	0	0	0	0	0	0	0	0	0
16.02	831.615	830.608	[M+H]+	CQ9:5	C54H86O2S2	1.025	0.853	65.5	0	36874	30982	26190	33274	0	0	0	0	0	0	0	0	0	0	0	0	0	0	0	0	30440	0	0	0	0	0	0	0	0	0	0	0	0	0	0	0	0	0	0	0
16.31	829.598	828.592	[M+H]+, [M+Na]+	CQ9:6	C54H84O2S2	-0.965	-0.801	60	0	31382	36839	50241	35218	33139	27110	17120	54049	50895	30204	33339	26861	30818	19200	39089	25076	23913	18255	32241	24450	0	32047	0	0	0	0	0	0	0	0	0	0	25579	0	0	0	0	0	0	0
15.84	459.328	458.321	[M+H]+	SQ4:0	C29H46O2S	-1.868	-0.858	53.7	0	0	103748	93785	40505	30308	49764	35288	0	0	10810	15497	14917	30107	39862	29075	28251	35582	26456	49746	32452	0	0	45191	0	0	0	0	0	0	0	0	0	0	29965	0	0	0	0	0	0
15.65	525.377	524.37	[M+H]+	SQ5:2	C34H52O2S	1.543	0.811	∞	36275	73534	95799	68254	84787	88369	98492	64773	77751	98027	73916	76796	87039	102245	146058	79412	82184	70320	69096	63354	70302	35355	46342	49513	40935	37553	33050	0	27619	54257	43190	51442	54955	42206	35583	51392	41168	38750	45519	30303	24089
16.32	599.485	598.478	[M+H]+	SQ6:0	C39H66O2S	-0.669	-0.401	54.3	0	58662	56509	43502	52850	47531	58883	29773	36943	45608	52108	43268	43057	30571	36245	58578	31651	61287	35226	58753	40169	0	0	19355	0	0	20320	0	0	0	0	0	0	0	0	0	0	21105	0	21424	21165
17.15	687.515	664.526	[M+Na]+	SQ7:2	C44H72O2S	0.608	0.418	115.5	0	0	13221	0	0	0	18747	19929	0	21734	0	0	0	0	0	19683	0	0	0	15321	0	0	0	0	0	0	0	0	0	0	0	0	0	0	0	0	0	0	0	0	0
14.4	683.483	660.494	[M+Na]+	SQ7:4	C44H68O2S	0.01	0.007	97	0	28555	27504	33233	26476	0	0	0	0	0	0	0	0	0	0	0	0	0	0	0	0	0	0	0	0	0	0	0	0	0	0	0	0	0	0	0	0	0	0	0	0
15.6	761.625	738.636	[M+Na]+	SQ8:0	C49H86O2S	1.274	0.97	18.6	0	0	0	114530	37213	0	0	0	0	0	0	0	0	0	0	0	0	0	0	0	0	0	0	32208	0	0	0	0	0	0	0	0	0	0	0	0	0	0	0	0	0
17.17	727.548	726.541	[M+H]+	SQ8:6	C49H74O2S	-0.442	-0.321	123.8	0	0	19554	23526	0	15931	0	0	26080	26367	0	0	0	0	0	18065	0	0	0	14574	0	0	0	0	0	0	0	0	0	0	0	0	0	0	0	0	0	0	0	0	0
16.79	725.531	724.524	[M+H]+	SQ8:7	C49H72O2S	-1.724	-1.251	246.9	0	0	0	0	0	0	0	0	0	0	0	0	0	0	0	0	0	0	0	0	0	0	0	0	0	0	227275	234309	0	0	0	0	0	0	0	230367	0	0	218279	0	0
17.66	897.751	874.762	[M+Na]+	SQ10:2	C59H102O2S	1.884	1.691	152.2	0	0	0	0	0	0	0	0	0	28579	39204	31391	33094	0	0	0	0	0	0	0	37742	0	0	0	0	0	0	0	0	0	0	0	0	0	0	0	0	0	0	0	0
17.52	869.72	868.713	[M+H]+	SQ10:5	C59H96O2S	-0.574	-0.499	155.7	0	0	0	0	0	0	0	0	0	19586	33295	26508	26881	0	0	0	0	0	0	0	37144	0	0	0	0	0	0	0	0	0	19767	0	0	0	0	0	0	0	0	0	0
16.41	887.67	864.681	[M+Na]+	SQ10:7	C59H92O2S	-1.038	-0.921	∞	0	0	0	0	0	93490	0	81004	0	0	56109	65941	90726	89809	105800	146074	104568	0	0	0	0	0	0	0	0	0	41918	0	38862	0	37088	0	0	0	0	0	106224	0	0	0	0
16.91	881.623	858.634	[M+Na]+	SQ10:10	C59H86O2S	-0.687	-0.606	35.2	0	0	27947	16020	0	30398	0	0	15197	38216	23268	0	21779	0	14899	41296	0	0	0	0	0	0	0	0	0	0	0	0	0	0	0	0	0	0	0	0	0	0	0	0	0
16.71	493.221	470.232	[M+Na]+	BDTQ4:1	C28H38O2S2	0.94	0.464	68.3	0	0	0	0	0	0	0	0	0	37505	0	0	13442	0	0	55163	0	0	0	0	0	0	0	0	0	0	0	0	0	0	0	0	0	0	0	0	0	0	0	0	0
15.85	747.521	746.514	[M+H]+	BDTQ8:3	C48H74O2S2	0.814	0.609	70	0	0	0	12595	24326	0	23453	0	0	14469	21203	24122	0	31525	21377	0	17306	0	17258	0	0	0	0	0	0	0	0	0	0	0	0	0	0	0	0	0	0	0	0	0	0
15.93	767.487	744.498	[M+Na]+	BDTQ8:4	C48H72O2S2	1.129	0.867	31.5	0	293972	156375	265305	185499	101255	115464	86477	166072	167195	150003	155890	142321	126454	505575	129284	120151	172473	114330	164443	198731	0	0	0	0	0	0	0	0	0	0	0	0	0	0	0	0	0	0	0	0
16.34	843.612	820.623	[M+Na]+	BDTQ9:1	C53H88O2S2	0.794	0.67	38.7	0	196199	654372	693814	564057	453876	445421	338157	757192	620787	517401	494317	450060	434407	265012	555058	445469	390564	358024	460441	408548	96525	367951	327565	302707	207997	231693	193558	250227	248925	269850	246377	244162	224967	109974	224576	219608	206056	204605	251402	194177
16.29	837.566	814.577	[M+Na]+	BDTQ9:4	C53H82O2S2	1.556	1.303	55.4	0	33853	120355	137974	109238	92836	79121	70891	185046	146127	98548	93525	92363	81592	45716	109354	113297	74819	73980	90856	89632	14280	0	0	0	0	0	41919	75396	0	59390	0	50857	37173	0	0	43710	36038	44772	46707	36564
16.07	809.535	808.527	[M+H]+	BDTQ9:7	C53H76O2S2	-1.624	-1.315	65.1	0	0	0	0	17509	39339	40171	0	80968	59721	53228	0	48596	35584	28678	49243	84307	0	0	45265	47826	0	0	0	0	0	0	0	0	0	0	0	0	0	0	0	0	0	0	0	0
16.7	915.704	892.714	[M+Na]+	BDTQ10:0	C58H100O2S2	-2.185	-2.001	61.1	0	0	0	0	0	24057	20835	18636	42390	26013	0	0	20734	0	0	29647	49776	0	0	0	0	0	0	0	0	0	0	0	0	0	0	0	0	0	0	0	0	0	0	0	0
16.42	879.614	878.607	[M+H]+	BDTQ10:7	C58H86O2S2	-0.461	-0.406	60.3	0	0	17324	14620	0	13197	14020	12450	12554	13971	0	0	0	0	0	15336	0	13356	0	14322	14796	0	0	0	0	0	0	0	0	0	0	0	0	0	0	0	0	0	0	0	0
➜ Compounds sorted by oxidation state: low to high ➜ Excluding m/z found only in MS/MS ➜ Excluding blank				Summed Compounds (MS)							Summed Compounds (MS/MS)
				RT [min]	Name	Fc	Lc	Tc	ne	e	RT [min]	Name	Fc	Lc	Tc	ne	e
				16.13	CQ4:0	482194	294391	152621	95950	402705	16.13	CQ4:0	280977	214241	190443	85036	236838
				16.05	CQ8:6	141835	32095	77593	204574	38426	16.05	CQ8:6	28506	0	0	80721	0
				16.43	CQ9:3	68977	77474	66750	34731	72894	16.43	CQ9:3	0	0	0	0	0
				16.02	CQ9:5	127320	0	0	0	0	16.02	CQ9:5	30440	0	0	0	0
				16.31	CQ9:6	153680	131418	141299	114183	98859	16.31	CQ9:6	32047	0	0	25579	0
				15.84	SQ4:0	238038	115360	41224	127295	144236	15.84	SQ4:0	45191	0	0	29965	0
				16.32	SQ6:0	211523	173130	184041	157045	195435	16.32	SQ6:0	19355	20320	0	0	63694
				17.15	SQ7:2	13221	38676	21734	19683	15321	17.15	SQ7:2	0	0	0	0	0
				14.4	SQ7:4	115768	0	0	0	0	14.4	SQ7:4	0	0	0	0	0
				15.6	SQ8:0	151743	0	0	0	0	15.6	SQ8:0	32208	0	0	0	0
				17.17	SQ8:6	43080	42011	26367	18065	14574	17.17	SQ8:6	0	0	0	0	0
				17.66	SQ10:2	0	0	132268	0	37742	17.66	SQ10:2	0	0	0	0	0
				17.52	SQ10:5	0	0	106270	0	37144	17.52	SQ10:5	0	0	19767	0	0
				16.41	SQ10:7	0	174494	212776	446251	0	16.41	SQ10:7	0	80780	37088	106224	0
				16.91	SQ10:10	43967	45595	83263	56195	0	16.91	SQ10:10	0	0	0	0	0
				16.71	BDTQ4:1	0	0	50947	55163	0	16.71	BDTQ4:1	0	0	0	0	0
				15.85	BDTQ8:3	36921	23453	59794	70208	17258	15.85	BDTQ8:3	0	0	0	0	0
				15.93	BDTQ8:4	901151	469268	615409	881464	649977	15.93	BDTQ8:4	0	0	0	0	0
				16.34	BDTQ9:1	2108442	1994646	2082565	1699946	1617577	16.34	BDTQ9:1	1094748	883475	1009314	779125	856240
				16.29	BDTQ9:4	401420	427894	430563	349959	329287	16.29	BDTQ9:4	14280	117315	110247	80883	164081
				16.07	BDTQ9:7	17509	160478	161545	197812	93091	16.07	BDTQ9:7	0	0	0	0	0
				16.7	BDTQ10:0	0	105918	46747	79423	0	16.7	BDTQ10:0	0	0	0	0	0
				16.42	BDTQ10:7	31944	52221	13971	15336	42474	16.42	BDTQ10:7	0	0	0	0	0
